# Supplementary material
Source: Research Square preprint supplement (doi:10.21203/rs.3.rs-8738011/v1)
Supplement: Supplementary file 1 [file cb52df1b663ae8e2cc8306ad.docx]

**This study identifies and extracts AMI patients from the database based on ICD codes:**

[1] ICD-9: 410.0 (410.00, 410.01, and 410.02), 410.1 (410.10, 410.11, and 410.12), 410.2 (410.20, 410.21, and 410.22), 410.3 (410.30, 410.31, and 410.32), 410.4 (410.40, 410.41, and 410.42), 410.5 (410.50, 410.51, and 410.52), 410.6 (410.60, 410.61, and 410.62), 410.7 (410.70, 410.71, and 410.72), 410.8 (410.80, 410.81, and 410.82), and 410.9 (410.90, 410.91, and 410.92); and [2] ICD-10: I21.0 (I21.01, I21.02, and I21.09), I21.1 (I21.11 and I21.19), I21.2 (I21.21 and I21.29), I21.3, and I21.4.

**Table S1. Reference range of items used for construction of FI-Lab**

| Items | Reference range |
| --- | --- |
| Vital signs |  |
| Systolic blood pressure (mm Hg) | 90–140 |
| Diastolic blood pressure (mm Hg) | 60–90 |
| Heart rate (bpm) | 60–99 |
| Venous blood samples |  |
| White cell count (×103/μL) | 4–11 |
| Platelet count (×109/L) | 150–440 |
| Hemoglobin (g/dL) | Female: 12–16 Male: 14–18 |
| Total bilirubin (mg/dL) | 0–1.5 |
| Alanine transaminase (Units/L) | 0–40 |
| Albumin (g/dL) | 3.5–5 |
| Alkaline phosphatase (Units/L) | 35–105 |
| Lactate dehydrogenase (Units/L) | 94–250 |
| Urea nitrogen (mg/dL) | 6–20 |
| Creatinine (mg/dL) | Female: 0.4–1.1 Male: 3.5–5.2 |
| Glucose (mg/dL) | 70–110 |
| Potassium (mmol/L) | 3.5–5.4 |
| Sodium (mmol/L) | 133–145 |
| Calcium (mg/dL) | 8.4–10.3 |
| Phosphorus (mg/dL) | 2.7–4.5 |
| Prothrombin time (s) | 9.4–12.5 |
| International normalized ratio | 0.9–1.1 |
| APTT (s) | 25–35 |
| Fibrinogen (mg/dL) | 150–400 |
| Troponin T (ng/mL) | 0–0.01 |
| Arterial blood gas samples |  |
| PH | 7.35–7.45 |
| PO2 (mm Hg) | 85–105 |
| PCO2 (mm Hg) | 35–45 |
| Lactate (mmol/L) | 0.5–2 |

APTT, activated partial thromboplastin time; PH, potential of hydrogen; PO2, partial pressure of oxygen; PCO2, partial pressure of carbon dioxide; SD, standard deviation

**Table S2. Detailed scoring rules of acute physiology score (APS) III**

| Demographics/Previous health status | | Diagnostic category | | Physiologic parameters on admission | |
| --- | --- | --- | --- | --- | --- |
| Parameters | Score | Parameters | Score | Parameters | Score |
| Age |  | Scheduled admission | 0 | Glasgow |  |
| < 40 | 0 | Non-scheduled admission | 3 | 3-4 | 15 |
| 40-59 | 5 | Urgency |  | 5 | 10 |
| 60-69 | 9 | Non-surgical | 5 | 6 | 7 |
| 70-74 | 13 | Elective | 0 | 7-12 | 2 |
| 75-79 | 15 | Emergency | 6 | ≥ 13 | 0 |
| ≥ 80 | 18 | Type of surgery |  | Heart rate |  |
| Comorbidities |  | Transplantation | -11 | <120 | 0 |
| Others | 0 | Trauma | -8 | 120-159 | 5 |
| Chemotherapy | 3 | MR without valve | -6 | ≥160 | 7 |
| ICC NYHA IV | 6 | Stroke surgery | 5 | Systolic blood pressure |  |
| Hematologic Neoplasia | 6 | Other | 0 | <40 | 11 |
| Cirrhosis | 8 | ICU admission add 16 points | 16 | 40-69 | 8 |
| Aids | 8 | Reason for admission |  | 70-119 | 3 |
| Metastasis | 11 | Neirologic |  | ≥ 120 | 0 |
| In-hospital days before ICU |  | Seizures | -4 | Oxygenation |  |
| <14 | 0 | Coma, confusion, agitation | 4 | MV PaO2/FiO2<100 | 11 |
| 14-27 | 6 | Focal deficit | 7 | MV PaO2/FiO2≥100 | 7 |
| ≥28 | 7 | Intracranial mass effect | 11 | Without MV PaO2 <60 | 5 |
| Origin |  | Cardiologic |  | Without MV PaO2 ≥60 | 0 |
| Operating room | 0 | Arrhythmia | -5 | Temperature |  |
| ER | 5 | Hemorrhagic shock | 3 | <34.5 | 7 |
| Other ICU | 7 | Non-hemorrhagic hypovolemic shock | 3 | ≥34.5 | 0 |
| Others | 8 | Distributive shock | 5 | Leukocytes |  |
| Vasoactive drugs |  | Abdomen |  | <15000 | 0 |
| Yes | 0 | Acute abdomen | 3 | ≥15000 | 2 |
| No | 3 | Severe pancreatitis | 9 | Platelets |  |
|  |  | Liver failure | 6 | <20000 | 13 |
|  |  | Others | 0 | 20000-49999 | 8 |
|  |  | Infection |  | 50000-99999 | 5 |
|  |  | Nosocomial | 4 | ≥100000 | 0 |
|  |  | Respiratory | 5 | pH |  |
|  |  | Others | 0 | ≤7.25 | 3 |
|  |  |  |  | >7.25 | 0 |
|  |  |  |  | Creatinine |  |
|  |  |  |  | <1.2 | 0 |
|  |  |  |  | 1.2-1.9 | 2 |
|  |  |  |  | 2.0-3.4 | 7 |
|  |  |  |  | ≥3.5 | 8 |
|  |  |  |  | Bilirubin |  |
|  |  |  |  | <2 | 0 |
|  |  |  |  | 2-5.9 | 4 |
|  |  |  |  | ≥6 | 5 |
| Total |  |  |  |  |  |

**Table S3. Detailed scoring rules of sequential organ failure assessment score (SOFA score)**

|  | Central nervous  System | Cardiovascular  System | Respiratory  System | Coagulation | Liver | Renal function |
| --- | --- | --- | --- | --- | --- | --- |
| Score | Glasgow coma scale | Mean arterial pressure OR administration of vasopressors | PaO2/FiO2  [mmHg (kPa)] | Platelets*103/ul | Bilirubin (mg/dl)  [µmol/L] | Creatinine (mg/dl) [µmol/L]  (or urine output) |
| 0 | 15 | MAP ≥ 70 mmHg | ≥ 400 (53.3) | ≥ 150 | < 1.2 [<20] | <1.2 [<110] |
| 1 | 13-14 | MAP < 70 mmHg | < 400 (53.3) | <150 | 1.2-1.9 [20-32] | 1.2-1.9 [110-170] |
| 2 | 10-12 | dopamine ≤ 5 µg/kg/min or dobutamine (any dose) | < 300 (40) | <100 | 2.0-5.9 [33-101] | 2.0-3.4 [171-299] |
| 3 | 6-9 | dopamine > 5µg/kg/min OR epinephrine ≤ 0.1µg/kg/min OR norepinephrine ≤ 0.1µg/kg/min | < 200 (26.7) and mechanically ventilated including CPAP | <50 | 6.0-11.9 [102-204] | 3.5-4.9 [300-400]  (or < 500ml/day) |
| 4 | <6 | dopamine > 15 μg/kg/min OR epinephrine > 0.1 μg/kg/min OR norepinephrine > 0.1 μg/kg/min | < 100 (13.3) and mechanically ventilated including CPAP | <20 | >12.0 [>204] | >5.0 [>440]  (or < 200ml/day) |

**Table S4. Detailed scoring rules of simplified acute physiology score (SAPS) II**

| Varibales | Score | | | | | | | | | | | | | | | | | | | | |
| --- | --- | --- | --- | --- | --- | --- | --- | --- | --- | --- | --- | --- | --- | --- | --- | --- | --- | --- | --- | --- | --- |
|  | 26 | 13 | 12 | 11 | 9 | 7 | 6 | 5 | 4 | 3 | 2 | 0 | 1 | 2 | 3 | 4 | 5 | 6 | 7 | 9 | 10 |
| HR (beats/min) |  |  |  | <40 |  |  |  |  |  |  | 40-69 | 70-119 |  |  |  | 120-159 |  |  | ≥ 160 |  |  |
| SBP (mmHg) |  | <70 |  |  |  |  |  | 70-99 |  |  |  | 100-199 |  | ≥200 |  |  |  |  |  |  |  |
| Temperature (℃) |  |  |  |  |  |  |  |  |  |  |  | <39 |  |  | ≥ 39 |  |  |  |  |  |  |
| PaO2/FiO2 only if VENT or CPAP |  |  |  | <100 | 100-199 | ≥200 |  |  |  |  |  |  |  |  |  |  |  |  |  |  |  |
| Urine output (L/day) |  |  |  | <0.5 |  |  |  |  | 0.5-1 |  |  | ≥1 |  |  |  |  |  |  |  |  |  |
| Urea (g.L) |  |  |  |  |  |  |  |  |  |  |  | <0.6 |  |  |  |  |  | 0.6-1.7 |  |  | ≥1.8 |
| TLC |  |  | <1 |  |  |  |  |  |  |  |  | 1-19.9 |  | ≥20 |  |  |  |  |  |  |  |
| Potassium |  |  |  |  |  |  |  |  |  | <3 |  | 3-4.9 |  | ≥5 |  |  |  |  |  |  |  |
| Sodium |  |  |  |  |  |  |  | <125 |  |  |  | 125-144 | ≥145 |  |  |  |  |  |  |  |  |
| Bicarbonate |  |  |  |  |  |  | <15 |  |  | 15-19 |  | ≥20 |  |  |  |  |  |  |  |  |  |
| Bilirubin (mg/dl) |  |  |  |  |  |  |  |  |  |  |  | <40 |  |  |  | 40-59.9 |  |  |  | ≥60 |  |
| GCS | <6 | 6-8 |  |  |  | 9-10 |  | 11-13 |  |  |  | 14-15 |  |  |  |  |  |  |  |  |  |
| Age | | | | Score | | | Chronic disease | | | | Score | | | Type of admission | | | | Score | | | |
| <40 | | | | 0 | | | Metastatic cancer | | | | 9 | | | Scheduled surgical | | | | 0 | | | |
| 40-59 | | | | 7 | | | Hematological malignancy | | | | 10 | | | Medical | | | | 6 | | | |
| 60-69 | | | | 12 | | | AIDS | | | | 17 | | | Emergency surgical | | | | 8 | | | |
| 70-74 | | | | 15 | | |  | | | |  | | |  | | | |  | | | |
| 75-79 | | | | 16 | | |  | | | |  | | |  | | | |  | | | |
| >80 | | | | 18 | | |  | | | |  | | |  | | | |  | | | |
| SAPS II score | | | |  | | | | | | | | | | | | | | | | | |

**Table S5. Detailed scoring rules of Oxford Acute Severity of Illness Score (OASIS)**

| Critierion | Range | score |
| --- | --- | --- |
| Pre-ICU Length of stay (hours) | <0.17 | 5 |
|  | 0.17-4.94 | 3 |
|  | 4.95-24.00 | 0 |
|  | 24.01-311.80 | 2 |
|  | >311.80 | 1 |
| Age | <24 | 0 |
|  | 24-53 | 3 |
|  | 54-77 | 6 |
|  | 77-89 | 9 |
|  | >90 | 7 |
| Heart rate (beats/min) | <33 | 4 |
|  | 33-88 | 0 |
|  | 89-106 | 1 |
|  | 107-125 | 3 |
|  | >125 | 6 |
| MAP (mmHg) | <20.65 | 4 |
|  | 20.65-50.99 | 3 |
|  | 51.00-61.32 | 2 |
|  | 62.33-143.44 | 0 |
|  | >143.44 | 3 |
| Respiratory rate (breaths/min) | <6 | 10 |
|  | 6-12 | 1 |
|  | 13-22 | 0 |
|  | 23-30 | 1 |
|  | 31-44 | 6 |
|  | >44 | 9 |
| Temperature (℃) | <33.22 | 3 |
|  | 33.22-35.93 | 4 |
|  | 35.94-36.39 | 2 |
|  | 36.40-36.88 | 0 |
|  | 36.89-39.88 | 2 |
|  | >39.88 | 6 |
| Urine output (ml) | <671 | 10 |
|  | 671-1426.99 | 5 |
|  | 1427-2543.99 | 1 |
|  | 2544-6896 | 0 |
|  | >6896 | 8 |
| Ventilated | Yes | 9 |
|  | No | 0 |
| Elective surgery | Yes | 6 |
|  | No | 0 |

**Nonlinear relationship between FI-LAB and patient prognosis (30-day, 90-day, and 360-day mortality)**


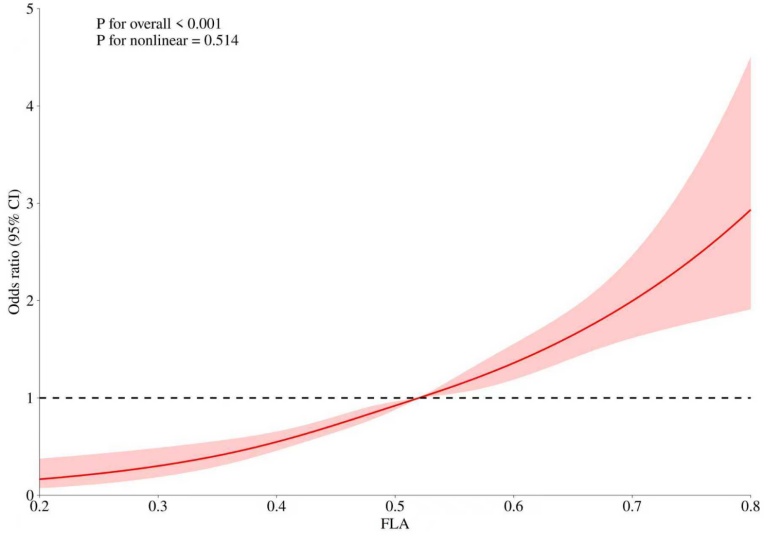


**Figure S 1** 30-day mortality


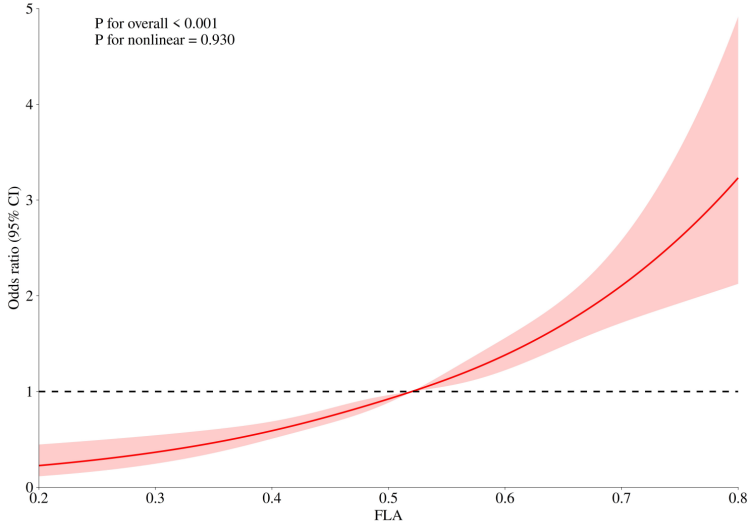


**Figure S 2** 90-day mortality


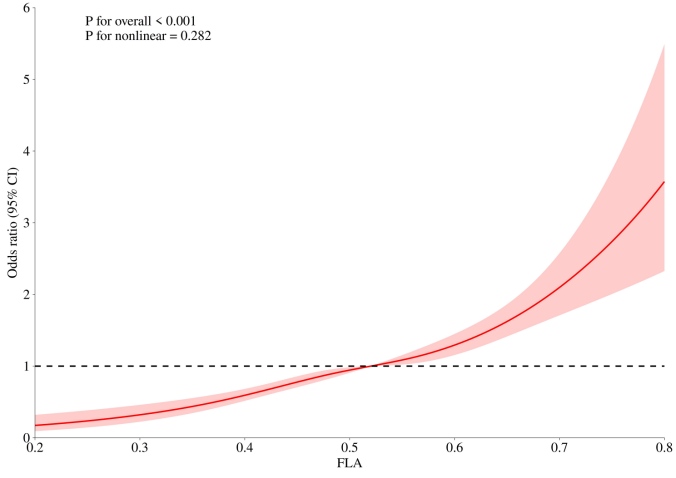


**Figure S 3** 360-day mortality
